# Supplementary material
Source: publisher site journal article supplement (https://www.dovepress.com/article/218068)
Supplement: Supplementary file 1 [file get_supplementary_file.php]

## Supplementary material

**Table S1- Interview topic guide (for patients)**

---

### Experiences with medication use

- Do you remember a time when you have not used your medications as prescribed? Please tell me why did this happen? (*Probe: do you change the way you take your medications on vacations/at weekends?*).

### Views and experiences with pharmacists and services provided by them

- Could you describe your views and experiences with pharmacists, and how regularly you see them?
- What information/services have the pharmacists provided to you regarding diabetes care? (*Probe: education, counselling, training.*)
- In what ways do you feel the pharmacists were helpful?
- Have you experienced a time when pharmacists were unhelpful? In what ways?
- Are there any services that you would like pharmacists to provide you all the time for your diabetes?
- Have you experienced any difficulties in dispensing your medications? What are these?

### A concluding question

- Finally, is there anything else about the role of pharmacists that you want to talk to me about? (*Probe: any other good things/problems/concerns.*)
- 

**Table S2- Interview topic guide (for primary care physicians)**

---

### Views and experiences with pharmacists and their role in type 2 diabetes management

- Among all other healthcare professionals, who do you think can play an important role in helping patients with type 2 diabetes with adhering to their medication regimens?
- How do you see the current pharmacist's role in supporting medication adherence in type 2 diabetes?
- How satisfied are you with the current role of pharmacists?
- If we want to improve the pharmacist's role to support patients with type 2 diabetes with their medication use, what must happen?

### A concluding question

- Finally, is there anything else about the role of pharmacists that you want to talk to me about? (*Probe: any other good things/problems/concerns.*)
-
